# Supplementary material
Source: PubMed Central journal article supplement (PMC8734589)
Supplement: NIHMS1638149-supplement-1.pdf [file NIHMS1638149-supplement-1.pdf]

## Supplemental online material

Table S1. Descriptive statistics for all study variables by age group.

| Variable                                  | 18-29 years          |                | 30-64 years          |                | 65+ years            |                |
|-------------------------------------------|----------------------|----------------|----------------------|----------------|----------------------|----------------|
|                                           | <i>M</i> or <i>n</i> | <i>SD</i> or % | <i>M</i> or <i>n</i> | <i>SD</i> or % | <i>M</i> or <i>n</i> | <i>SD</i> or % |
| Sex                                       |                      |                |                      |                |                      |                |
| male                                      | 159                  | 48.5           | 716                  | 45.8           | 249                  | 45.3           |
| female                                    | 169                  | 51.5           | 846                  | 54.2           | 301                  | 54.7           |
| Age                                       | 25.06                | 2.98           | 47.25                | 10.23          | 73.43                | 6.85           |
| Race-ethnicity                            |                      |                |                      |                |                      |                |
| minority group                            | 137.8                | 42.0           | 490.2                | 31.4           | 102                  | 18.5           |
| non-Hispanic White                        | 190.2                | 58.0           | 1071.8               | 68.6           | 448                  | 81.5           |
| Household-size adjusted annual log-income | 9.92                 | 1.25           | 10.40                | 1.05           | 10.39                | 1.03           |
| Years of education                        | 13.78                | 2.20           | 14.04                | 2.88           | 13.65                | 3.25           |
| Work status                               |                      |                |                      |                |                      |                |
| no job                                    | 29                   | 8.8            | 101                  | 6.5            | 12                   | 2.2            |
| other                                     | 70                   | 21.3           | 244.4                | 15.6           | 56                   | 10.2           |
| retired                                   | 0                    | 0.0            | 120                  | 7.7            | 377                  | 68.5           |
| with job                                  | 229                  | 69.8           | 1096.6               | 70.2           | 105                  | 19.1           |
| Household size                            |                      |                |                      |                |                      |                |
| 1 person                                  | 53                   | 16.2           | 326                  | 20.9           | 236                  | 42.9           |
| 2 persons                                 | 101                  | 30.8           | 553                  | 35.4           | 252                  | 45.8           |
| 3+ persons                                | 174                  | 53.0           | 683                  | 43.7           | 62                   | 11.3           |
| Children in household                     |                      |                |                      |                |                      |                |
| with kids                                 | 85                   | 25.9           | 485.6                | 31.1           | 26.6                 | 4.8            |
| without kids                              | 243                  | 74.1           | 1076.4               | 68.9           | 523.4                | 95.2           |
| Marital status                            |                      |                |                      |                |                      |                |
| married                                   | 60                   | 18.3           | 804                  | 51.5           | 228.2                | 41.5           |
| widowed                                   | 0                    | 0.0            | 51                   | 3.3            | 153                  | 27.8           |

|                                           |      |      |      |      |       |      |
|-------------------------------------------|------|------|------|------|-------|------|
| divorced or separated                     | 15   | 4.6  | 363  | 23.2 | 138.4 | 25.2 |
| never married                             | 253  | 77.1 | 344  | 22.0 | 30.4  | 5.5  |
| Self-rated health                         | 2.98 | 0.82 | 2.89 | 0.80 | 2.76  | 0.83 |
| Religious engagement                      | 2.25 | 1.93 | 2.89 | 2.26 | 3.44  | 2.61 |
| Frequency of spending time with friends   | 4.64 | 1.36 | 3.99 | 1.51 | 3.47  | 1.65 |
| Frequency of spending time with relatives | 4.84 | 1.65 | 4.55 | 1.72 | 4.46  | 1.74 |
| Frequency of spending time with neighbors | 3.79 | 2.10 | 3.31 | 1.98 | 3.44  | 2.03 |
| Loneliness                                | 1.96 | 0.81 | 1.90 | 0.83 | 1.85  | 0.82 |

*Notes.* Descriptive statistics are pooled across five imputed data sets. Descriptive statistics for the original data with missing values are provided in the online supplemental material. For categorical variables, absolute frequencies (*n*) and percentages (%) are provided for each category. For continuous variables, means (*M*) and standard deviations (*SD*) are provided.

Table S2. Descriptive statistics for all study variables in the original sample (with missing values) and in the imputed samples (without missing values).

| Variable                                  | Original data        |                | Imputed data         |                |
|-------------------------------------------|----------------------|----------------|----------------------|----------------|
|                                           | <i>M</i> or <i>n</i> | <i>SD</i> or % | <i>M</i> or <i>n</i> | <i>SD</i> or % |
| Sex                                       |                      |                |                      |                |
| male                                      | 1124                 | 46.1           | 1124                 | 46.1           |
| female                                    | 1316                 | 53.9           | 1316                 | 53.9           |
| Age                                       | 50.16                | 17.06          | 50.16                | 17.06          |
| Race-ethnicity                            |                      |                |                      |                |
| minority group                            | 727                  | 29.9           | 730                  | 29.9           |
| non-Hispanic White                        | 1704                 | 70.1           | 1710                 | 70.1           |
| Household-size adjusted annual log-income | 10.33                | 1.08           | 10.33                | 1.08           |
| Years of education                        | 13.92                | 2.89           | 13.92                | 2.89           |
| Work status                               |                      |                |                      |                |
| no job                                    | 142                  | 5.8            | 142                  | 5.8            |
| other                                     | 370                  | 15.2           | 370.4                | 15.2           |
| retired                                   | 497                  | 20.4           | 497                  | 20.4           |
| with job                                  | 1430                 | 58.6           | 1430.6               | 58.6           |
| Household size                            |                      |                |                      |                |
| 1 person                                  | 615                  | 25.2           | 615                  | 25.2           |
| 2 persons                                 | 906                  | 37.1           | 906                  | 37.1           |
| 3+ persons                                | 919                  | 37.7           | 919                  | 37.7           |
| Children in household                     |                      |                |                      |                |
| with kids                                 | 589                  | 24.5           | 597.2                | 24.5           |
| without kids                              | 1816                 | 75.5           | 1842.8               | 75.5           |
| Marital status                            |                      |                |                      |                |
| married                                   | 1091                 | 44.7           | 1092.2               | 44.8           |
| widowed                                   | 204                  | 8.4            | 204                  | 8.4            |
| divorced or separated                     | 516                  | 21.2           | 516.4                | 21.2           |

|                                           |      |      |       |      |
|-------------------------------------------|------|------|-------|------|
| never married                             | 627  | 25.7 | 627.4 | 25.7 |
| Self-rated health                         | 2.88 | 0.81 | 2.87  | 0.82 |
| Religious engagement                      | 2.93 | 2.33 | 2.93  | 2.33 |
| Frequency of spending time with friends   | 3.91 | 1.57 | 3.96  | 1.56 |
| Frequency of spending time with relatives | 4.58 | 1.70 | 4.57  | 1.72 |
| Frequency of spending time with neighbors | 3.38 | 1.99 | 3.40  | 2.01 |
| Loneliness                                | 1.90 | 0.82 | 1.90  | 0.82 |

*Notes.* Descriptive statistics for imputed data are pooled across five imputed data sets. For categorical variables, absolute frequencies (n) and percentages (%) are provided for each category. For continuous variables, means (M) and standard deviations (SD) are provided.

Table S3. Moderated regression model exploring interactions between all predictor variables and survey year in predicting loneliness.

| Predictor                                        | Estimate | SE   | <i>t</i> | <i>p</i> |
|--------------------------------------------------|----------|------|----------|----------|
| (Intercept)                                      | -0.12    | 0.17 | -0.72    | 0.470    |
| Survey year: 2018                                | -0.01    | 0.24 | -0.03    | 0.975    |
| Age                                              | 0.00     | 0.00 | -0.44    | 0.658    |
| Age <sup>2</sup>                                 | 0.00     | 0.00 | -1.21    | 0.227    |
| Sex: female                                      | 0.00     | 0.06 | -0.06    | 0.950    |
| Race-ethnicity: non-Hispanic White               | 0.12     | 0.06 | 1.92     | 0.056    |
| Adjusted annual income                           | -0.08    | 0.03 | -2.52    | 0.013    |
| Years of education                               | 0.01     | 0.01 | 1.34     | 0.180    |
| Work status: other                               | 0.32     | 0.13 | 2.53     | 0.011    |
| Work status: retired                             | 0.12     | 0.14 | 0.84     | 0.402    |
| Work status: with job                            | 0.07     | 0.11 | 0.57     | 0.567    |
| Household size: 2 persons                        | -0.32    | 0.09 | -3.63    | 0< .001  |
| Household size: 3+ persons                       | -0.22    | 0.10 | -2.21    | 0.027    |
| Living without children                          | 0.12     | 0.09 | 1.35     | 0.177    |
| Marital status: widowed                          | 0.45     | 0.13 | 3.46     | 0.001    |
| Marital status: separated/divorced               | 0.21     | 0.08 | 2.53     | 0.011    |
| Marital status: never married                    | 0.22     | 0.09 | 2.45     | 0.015    |
| Self-rated health                                | -0.16    | 0.04 | -4.25    | 0< .001  |
| Religious engagement                             | 0.01     | 0.01 | 0.45     | 0.651    |
| Frequency of spending time with friends          | 0.00     | 0.02 | 0.11     | 0.910    |
| Frequency of spending time with relatives        | -0.04    | 0.02 | -1.68    | 0.110    |
| Frequency of spending time with neighbors        | -0.04    | 0.02 | -1.87    | 0.085    |
| Survey year x Age                                | 0.00     | 0.00 | -0.68    | 0.500    |
| Survey year x Age <sup>2</sup>                   | 0.00     | 0.00 | 0.70     | 0.487    |
| Survey year x Sex: female                        | 0.01     | 0.08 | 0.09     | 0.930    |
| Survey year x Race-ethnicity: non-Hispanic White | -0.09    | 0.09 | -1.04    | 0.297    |

|                                                         |       |      |       |       |
|---------------------------------------------------------|-------|------|-------|-------|
| Survey year x Adjusted annual income                    | 0.04  | 0.04 | 0.90  | 0.369 |
| Survey year x Years of education                        | -0.01 | 0.01 | -0.79 | 0.432 |
| Survey year x Work status: other                        | -0.50 | 0.18 | -2.77 | 0.006 |
| Survey year x Work status: retired                      | -0.46 | 0.20 | -2.35 | 0.019 |
| Survey year x Work status: with job                     | -0.27 | 0.16 | -1.68 | 0.094 |
| Survey year x Household size: 2 persons                 | 0.20  | 0.13 | 1.56  | 0.119 |
| Survey year x Household size: 3+ persons                | 0.17  | 0.15 | 1.12  | 0.265 |
| Survey year x Living without children                   | -0.14 | 0.14 | -1.06 | 0.292 |
| Survey year x Marital status: widowed                   | 0.22  | 0.20 | 1.12  | 0.261 |
| Survey year x Marital status: separated/divorced        | 0.30  | 0.12 | 2.47  | 0.014 |
| Survey year x Marital status: never married             | 0.34  | 0.12 | 2.81  | 0.005 |
| Survey year x Self-rated health                         | -0.10 | 0.05 | -1.84 | 0.069 |
| Survey year x Religious engagement                      | 0.01  | 0.02 | 0.58  | 0.561 |
| Survey year x Frequency of spending time with friends   | 0.00  | 0.04 | -0.01 | 0.992 |
| Survey year x Frequency of spending time with relatives | -0.04 | 0.03 | -1.56 | 0.123 |
| Survey year x Frequency of spending time with neighbors | 0.02  | 0.03 | 0.94  | 0.358 |

*Notes.* Categorical variables were dummy-coded with 0 for 2014 (survey year), male (sex), minority group (race-ethnicity), no job (work status), 1-person household (household size), and married (marital status). Continuous predictors were centered on the on the grand mean (computed across the two waves) prior to these analyses. The outcome variable loneliness was standardized on the grand mean and grand standard deviation (computed across the two waves).

Table S4. Regression models for absolute and age-normative predictors: Wave 2014.

| Predictor                                 | Model 1  |      |      | Model 2  |      |      | Model 3  |      |      |
|-------------------------------------------|----------|------|------|----------|------|------|----------|------|------|
|                                           | Estimate | SE   | p    | Estimate | SE   | p    | Estimate | SE   | p    |
| (Intercept)                               | -0.12    | 0.16 | .483 | 0.12     | 0.11 | .278 | -0.03    | 0.18 | .855 |
| Age                                       | -0.001   | 0.00 | .559 | 0.00     | 0.00 | .301 | 0.00     | 0.00 | .125 |
| Age <sup>2</sup>                          | -0.0001  | 0.00 | .212 | 0.00     | 0.00 | .306 | 0.00     | 0.00 | .092 |
| Sex: female                               | -0.004   | 0.06 | .949 | -0.02    | 0.05 | .654 | -0.09    | 0.06 | .130 |
| Race-ethnicity: non-Hispanic White        | 0.12     | 0.06 | .048 | 0.13     | 0.06 | .037 | 0.15     | 0.06 | .018 |
| Adjusted annual income                    | -0.08    | 0.03 | .011 |          |      |      | -0.10    | 0.05 | .030 |
| Years of education                        | 0.01     | 0.01 | .166 |          |      |      | 0.02     | 0.01 | .120 |
| Work status: other                        | 0.32     | 0.12 | .009 |          |      |      | 0.38     | 0.13 | .003 |
| Work status: retired                      | 0.12     | 0.13 | .386 |          |      |      | 0.19     | 0.16 | .212 |
| Work status: with job                     | 0.07     | 0.11 | .553 |          |      |      | 0.05     | 0.15 | .753 |
| Household size: 2 persons                 | -0.32    | 0.09 | .000 |          |      |      | -0.31    | 0.09 | .001 |
| Household size: 3+ persons                | -0.22    | 0.10 | .022 |          |      |      | -0.18    | 0.10 | .094 |
| Living without children                   | 0.12     | 0.09 | .165 |          |      |      | 0.14     | 0.10 | .158 |
| Marital status: widowed                   | 0.45     | 0.13 | .000 |          |      |      | 0.42     | 0.14 | .002 |
| Marital status: separated/divorced        | 0.21     | 0.08 | .009 |          |      |      | 0.13     | 0.10 | .180 |
| Marital status: never married             | 0.22     | 0.09 | .012 |          |      |      | 0.21     | 0.09 | .023 |
| Self-rated health                         | -0.16    | 0.04 | .000 |          |      |      | -0.18    | 0.04 | .000 |
| Religious engagement                      | 0.01     | 0.01 | .640 |          |      |      | -0.02    | 0.02 | .270 |
| Frequency of spending time with friends   | 0.00     | 0.02 | .907 |          |      |      | -0.01    | 0.02 | .714 |
| Frequency of spending time with relatives | -0.04    | 0.02 | .105 |          |      |      | -0.04    | 0.02 | .115 |
| Frequency of spending time with neighbors | -0.04    | 0.02 | .083 |          |      |      | -0.04    | 0.02 | .083 |

|                                                                    |       |      |      |       |      |      |
|--------------------------------------------------------------------|-------|------|------|-------|------|------|
| Deviation from normative adjusted annual income                    | 0.02  | 0.01 | .143 | -0.02 | 0.02 | .299 |
| Deviation from normative years of education                        | 0.00  | 0.00 | .348 | 0.00  | 0.00 | .747 |
| Normative work status                                              | -0.10 | 0.06 | .106 | 0.07  | 0.10 | .478 |
| Normative household size                                           | -0.04 | 0.06 | .529 | 0.01  | 0.06 | .870 |
| Normative children-in-household status                             | -0.04 | 0.06 | .512 | -0.09 | 0.07 | .214 |
| Normative marital status                                           | -0.31 | 0.06 | .000 | -0.13 | 0.07 | .055 |
| Deviation from normative self-rated health                         | 0.05  | 0.03 | .140 | -0.02 | 0.04 | .660 |
| Deviation from normative religious engagement                      | 0.00  | 0.00 | .519 | 0.01  | 0.00 | .113 |
| Deviation from normative frequency of spending time with friends   | 0.00  | 0.01 | .993 | -0.01 | 0.01 | .597 |
| Deviation from normative frequency of spending time with relatives | 0.00  | 0.01 | .710 | -0.01 | 0.01 | .308 |
| Deviation from normative frequency of spending time with neighbors | -0.01 | 0.01 | .370 | -0.01 | 0.01 | .386 |

---

Notes. Categorical variables were dummy-coded with 0 for male (sex), minority group (race-ethnicity), no job (work status), 1-person household (household size), and married (marital status). Normative categorical variables were dummy-coded with 0 = non-normative status and 1 = normative status. Continuous predictors were centered on the on the grand mean (computed within this wave) prior to these analyses. Normative continuous predictors reflect the squared deviation from the reference value. The outcome variable loneliness was standardized on the grand mean and grand standard deviation.



Table S5. Regression models for absolute and age-normative predictors: Wave 2018.

| Predictor                                 | Model 1  |      |      | Model 2  |      |      | Model 3  |      |      |
|-------------------------------------------|----------|------|------|----------|------|------|----------|------|------|
|                                           | Estimate | SE   | p    | Estimate | SE   | p    | Estimate | SE   | p    |
| (Intercept)                               | -0.13    | 0.18 | .468 | 0.52     | 0.15 | .001 | 0.48     | 0.21 | .025 |
| Age                                       | -0.004   | 0.00 | .230 | 0.00     | 0.00 | .790 | 0.00     | 0.00 | .883 |
| Age <sup>2</sup>                          | 0.0000   | 0.00 | .783 | 0.00     | 0.00 | .610 | 0.00     | 0.00 | .010 |
| Sex: female                               | 0.003    | 0.06 | .954 | -0.08    | 0.06 | .208 | -0.06    | 0.07 | .382 |
| Race-ethnicity: non-Hispanic White        | 0.03     | 0.06 | .665 | -0.01    | 0.07 | .856 | 0.07     | 0.07 | .329 |
| Adjusted annual income                    | -0.04    | 0.03 | .140 |          |      |      | -0.05    | 0.04 | .247 |
| Years of education                        | 0.00     | 0.01 | .803 |          |      |      | 0.00     | 0.01 | .967 |
| Work status: other                        | -0.18    | 0.13 | .172 |          |      |      | -0.20    | 0.14 | .160 |
| Work status: retired                      | -0.35    | 0.15 | .018 |          |      |      | -0.16    | 0.19 | .392 |
| Work status: with job                     | -0.20    | 0.12 | .080 |          |      |      | -0.13    | 0.16 | .397 |
| Household size: 2 persons                 | -0.12    | 0.10 | .195 |          |      |      | -0.17    | 0.10 | .096 |
| Household size: 3+ persons                | -0.06    | 0.11 | .616 |          |      |      | -0.13    | 0.12 | .291 |
| Living without children                   | -0.02    | 0.10 | .815 |          |      |      | 0.47     | 0.37 | .200 |
| Marital status: widowed                   | 0.67     | 0.15 | .000 |          |      |      | 0.73     | 0.16 | .000 |
| Marital status: separated/divorced        | 0.51     | 0.09 | .000 |          |      |      | 0.53     | 0.11 | .000 |
| Marital status: never married             | 0.56     | 0.09 | .000 |          |      |      | 0.50     | 0.10 | .000 |
| Self-rated health                         | -0.26    | 0.04 | .000 |          |      |      | -0.27    | 0.05 | .000 |
| Religious engagement                      | 0.02     | 0.01 | .268 |          |      |      | 0.05     | 0.02 | .029 |
| Frequency of spending time with friends   | 0.00     | 0.03 | .955 |          |      |      | 0.00     | 0.03 | .892 |
| Frequency of spending time with relatives | -0.08    | 0.02 | .000 |          |      |      | -0.09    | 0.02 | .001 |
| Frequency of spending time with neighbors | -0.01    | 0.02 | .353 |          |      |      | -0.03    | 0.02 | .159 |

|                                                                    |       |      |      |       |      |      |
|--------------------------------------------------------------------|-------|------|------|-------|------|------|
| Deviation from normative adjusted annual income                    | 0.02  | 0.01 | .072 | 0.00  | 0.01 | .997 |
| Deviation from normative years of education                        | 0.00  | 0.00 | .503 | 0.00  | 0.00 | .834 |
| Normative work status                                              | -0.09 | 0.07 | .167 | -0.10 | 0.11 | .400 |
| Normative household size                                           | -0.06 | 0.06 | .315 | -0.01 | 0.06 | .905 |
| Normative children-in-household status                             | -0.08 | 0.08 | .316 | -0.59 | 0.35 | .093 |
| Normative marital status                                           | -0.26 | 0.07 | .000 | 0.09  | 0.08 | .265 |
| Deviation from normative self-rated health                         | 0.06  | 0.04 | .111 | -0.03 | 0.04 | .432 |
| Deviation from normative religious engagement                      | 0.00  | 0.00 | .272 | -0.01 | 0.00 | .084 |
| Deviation from normative frequency of spending time with friends   | 0.01  | 0.02 | .738 | 0.01  | 0.02 | .760 |
| Deviation from normative frequency of spending time with relatives | 0.00  | 0.01 | .966 | -0.01 | 0.01 | .186 |
| Deviation from normative frequency of spending time with neighbors | 0.00  | 0.01 | .779 | 0.00  | 0.01 | .591 |

---

Notes. Categorical variables were dummy-coded with 0 for male (sex), minority group (race-ethnicity), no job (work status), 1-person household (household size), and married (marital status). Normative categorical variables were dummy-coded with 0 = non-normative status and 1 = normative status. Continuous predictors were centered on the on the grand mean (computed within this wave) prior to these analyses. Normative continuous predictors reflect the squared deviation from the reference value. The outcome variable loneliness was standardized on the grand mean and grand standard deviation.

*Table S6.* Results for model comparison tests for interactions between different focal predictors and age in predicting loneliness.

| Focal predictor              | Interaction with age and age <sup>2</sup> |        |        |      |      | Interaction with age group |        |        |      |      |
|------------------------------|-------------------------------------------|--------|--------|------|------|----------------------------|--------|--------|------|------|
|                              | $\Delta R^2$                              | $df_1$ | $df_2$ | $F$  | $p$  | $\Delta R^2$               | $df_1$ | $df_2$ | $F$  | $p$  |
| Income                       | 0.0003                                    | 2      | 2416   | 0.40 | .700 | 0.0004                     | 2      | 2416   | 0.53 | .618 |
| Workstatus                   | 0.0025                                    | 6      | 2412   | 1.15 | .334 | 0.0006                     | 5      | 2413   | 0.32 | .899 |
| Household size               | 0.0037                                    | 4      | 2414   | 2.63 | .035 | 0.0032                     | 4      | 2414   | 2.28 | .061 |
| Children living in household | 0.0010                                    | 2      | 2416   | 1.41 | .257 | 0.0009                     | 2      | 2416   | 1.25 | .300 |
| Marital status               | 0.0012                                    | 6      | 2412   | 0.56 | .765 | 0.0008                     | 5      | 2413   | 0.47 | .802 |
| Self-rated health            | 0.0005                                    | 2      | 2416   | 0.67 | .564 | 0.0003                     | 2      | 2416   | 0.38 | .704 |
| Religious engagement         | 0.0011                                    | 2      | 2416   | 1.56 | .218 | 0.0008                     | 2      | 2416   | 1.09 | .341 |
| Spending time with friends   | 0.0008                                    | 2      | 2416   | 1.06 | .454 | 0.0007                     | 2      | 2416   | 0.97 | .504 |
| Spending time with relatives | 0.0007                                    | 2      | 2416   | 0.95 | .447 | 0.0007                     | 2      | 2416   | 0.94 | .452 |
| Spending time with neighbors | 0.0009                                    | 2      | 2416   | 1.28 | .551 | 0.0019                     | 2      | 2416   | 2.61 | .289 |

*Notes.* Every interaction between age and a focal predictor was examined in separate model.

Table S7. Interaction with age: Wave 2014.

| Focal predictor              | Interaction with age and age <sup>2</sup> |                 |                 |      |      | Interaction with age group |                 |                 |      |      |
|------------------------------|-------------------------------------------|-----------------|-----------------|------|------|----------------------------|-----------------|-----------------|------|------|
|                              | DR <sup>2</sup>                           | Df <sub>1</sub> | Df <sub>2</sub> | F    | p    | DR <sup>2</sup>            | Df <sub>1</sub> | Df <sub>2</sub> | F    | p    |
| Income                       | 0.0011                                    | 2               | 1255            | 0.81 | .571 | 0.0005                     | 2               | 1255            | 0.39 | .696 |
| Workstatus                   | 0.0054                                    | 6               | 1251            | 1.29 | .267 | 0.0029                     | 5               | 1252            | 0.82 | .536 |
| Household size               | 0.0080                                    | 4               | 1253            | 2.88 | .024 | 0.0052                     | 4               | 1253            | 1.87 | .121 |
| Children living in household | 0.0010                                    | 2               | 1255            | 0.75 | .486 | 0.0005                     | 2               | 1255            | 0.34 | .713 |
| Marital status               | 0.0062                                    | 6               | 1251            | 1.48 | .188 | 0.0023                     | 5               | 1252            | 0.66 | .657 |
| Self-rated health            | 0.0022                                    | 2               | 1255            | 1.58 | .262 | 0.0025                     | 2               | 1255            | 1.76 | .186 |
| Religious engagement         | 0.0065                                    | 2               | 1255            | 4.69 | .010 | 0.0040                     | 2               | 1255            | 2.85 | .060 |
| Spending time with friends   | 0.0017                                    | 2               | 1255            | 1.22 | .356 | 0.0019                     | 2               | 1255            | 1.39 | .285 |
| Spending time with relatives | 0.0008                                    | 2               | 1255            | 0.54 | .642 | 0.0014                     | 2               | 1255            | 0.97 | .509 |
| Spending time with neighbors | 0.0017                                    | 2               | 1255            | 1.19 | .338 | 0.0027                     | 2               | 1255            | 1.93 | .191 |

Table S8. Interaction with age: Wave 2018.

| Focal predictor              | Interaction with age and age <sup>2</sup> |                 |                 |      |      | Interaction with age group |                 |                 |      |      |
|------------------------------|-------------------------------------------|-----------------|-----------------|------|------|----------------------------|-----------------|-----------------|------|------|
|                              | DR <sup>2</sup>                           | Df <sub>1</sub> | Df <sub>2</sub> | F    | p    | DR <sup>2</sup>            | Df <sub>1</sub> | Df <sub>2</sub> | F    | p    |
| Income                       | 0.0002                                    | 2               | 1139            | 0.11 | .895 | 0.0012                     | 2               | 1139            | 0.80 | .504 |
| Workstatus                   | 0.0048                                    | 6               | 1135            | 1.11 | .366 | 0.0038                     | 5               | 1136            | 1.06 | .394 |
| Household size               | 0.0009                                    | 4               | 1137            | 0.32 | .860 | 0.0010                     | 4               | 1137            | 0.34 | .852 |
| Children living in household | 0.0004                                    | 2               | 1139            | 0.30 | .753 | 0.0016                     | 2               | 1139            | 1.10 | .346 |
| Marital status               | 0.0095                                    | 6               | 1135            | 2.20 | .044 | 0.0020                     | 5               | 1136            | 0.56 | .732 |
| Self-rated health            | 0.0035                                    | 2               | 1139            | 2.43 | .103 | 0.0030                     | 2               | 1139            | 2.11 | .124 |
| Religious engagement         | 0.0004                                    | 2               | 1139            | 0.26 | .771 | 0.0001                     | 2               | 1139            | 0.06 | .944 |
| Spending time with friends   | 0.0016                                    | 2               | 1139            | 1.07 | .427 | 0.0013                     | 2               | 1139            | 0.91 | .484 |
| Spending time with relatives | 0.0012                                    | 2               | 1139            | 0.85 | .478 | 0.0011                     | 2               | 1139            | 0.75 | .513 |
| Spending time with neighbors | 0.0020                                    | 2               | 1139            | 1.40 | .425 | 0.0021                     | 2               | 1139            | 1.44 | .429 |
